# Supplementary material
Source: Research Square preprint supplement (doi:10.21203/rs.3.rs-10020668/v1)
Supplement: Supplementary file 1 [file 8e4b3c23e4b4cf42e16cdf93.docx]

**Supplementary Table S1**

*Item Wording, Psychometric Properties, and CFA Evidence for All Scales*

N = 824 teachers; 52 schools; 18 circuits. All items were rated on a 1–5 scale (Strongly Disagree to Strongly Agree).

| **Scale (items)** | **N** | **Example Items** | **ω** | **α** | **AVE** | **CR** | **CVR/CVI** |
| --- | --- | --- | --- | --- | --- | --- | --- |
| PBA Pressure | 8 | "Performance on the BECE significantly influences the professional evaluation of teachers in this school."  "GES inspection results exert substantial pressure on how we organise our teaching in this school." | 0.83 | 0.81 | 0.51 | 0.87 | 0.85/0.91 |
|  |  |  |  |  |  |  |  |
| IAP: Normative Coherence | 3 | "In this school, teachers hold each other to shared expectations about what good teaching looks like." | — | — | — | — | 0.84/0.89 |
| IAP: Structural Coherence | 3 | "In this school, teachers regularly observe each other's lessons and provide constructive feedback." | — | — | — | — | — |
| IAP: Data Use Practices | 3 | "In this school, we collectively discuss what BECE results tell us about our instructional effectiveness." | — | — | — | — | — |
| IAP (composite) | 9 | See sub-dimensions above.    3-factor CFA fit better than 1-factor: ΔCFI=.031, p=.002  Factor inter-correlations: .61–.74 | 0.86 | 0.84 | 0.52 | 0.89 | 0.84/0.89 |
|  |  |  |  |  |  |  |  |
| TPA: Iterative | 4 | "I actively adapt the SBC curriculum to the specific learning needs of my students, drawing on my professional experience." | — | — | — | — | — |
| TPA: Projective | 3 | "I actively plan how to integrate new knowledge into my professional practice to support my students' learning." | — | — | — | — | — |
| TPA: Practical-Evaluative | 3 | "I can maintain my instructional convictions even when external accountability demands point in a different direction." | — | — | — | — | — |
| TPA (composite) | 10 | See sub-dimensions above.    3-factor CFA fit better than 1-factor: ΔCFI=.027, p=.010  Factor inter-correlations: .58–.71 | 0.87 | 0.85 | 0.53 | 0.91 | — |
|  |  |  |  |  |  |  |  |
| CCC (school-level agg.) | 7 | "Teachers in this school regularly participate in professional learning activities with teachers from other circuit schools."  "Our circuit supervisor organises structured opportunities for schools in this circuit to share assessment data and improvement strategies." | 0.84 | 0.82 | — | — | 0.83/0.88 |
|  |  |  |  |  |  |  |  |

**Note.** ω = McDonald’s omega; α = Cronbach’s alpha; AVE = average variance extracted; CR = composite reliability; CVR = content validity ratio (Lawshe, 1975); CVI = content validity index (Lynn, 1986). CVR/CVI reported for scales with expert panel review; PBA adapted from Verger and Skedsmo (2021) and Carnoy and Loeb (2002); IAP newly developed following Abelmann and Elmore (1999); TPA adapted from Soini et al. (2016) and Toom et al. (2015); CCC newly developed following Bryk et al. (2015), Daly (2010), and Ehren and Godfrey (2017). Standardised factor loadings range: PBA 0.54–0.78; IAP 0.56–0.83; TPA 0.57–0.81; CCC 0.55–0.80. HTMT ratios: IAP–TPA = 0.74; PBA–IAP = 0.51; CCC–PDL = 0.63; all below 0.85 threshold (Henseler et al., 2015). Full item wording available from the author on request.
